# Supplementary material for: Targeting GFPT2 to reinvigorate immunotherapy in EGFR-mutated NSCLC
Source: bioRxiv preprint, doi:10.1101/2024.03.01.582888, version 1 (2024-03-04)
Supplement: Supplementary Table.1 [file 582888_file03.xlsx]

## Sheet: Description
Table S1. Metabolomic profiling: A comparative analysis between EGFR wild-type (EGFRWT) and EGFR-mutated (EGFRMut) tumors (T) and their matched non-tumor adjacent tissues (NAT). Related to Fig.1.
Sheet	Description
Table S1A	Basic information of included patients
Table S1B	Peak area of metabolites in tumors (T) and matched non-tumor adjacent tissues (NAT) from NSCLC patients
Table S1C	Peak area of metabolites with fold change (EGFRMut/WT > 1.5 or < 0.5) and p < 0.05
Table S1D	A list of metabolites with fold change(EGFRMut/WT > 1.5 or < 0.5) and p < 0.05

## Sheet: Table S1A
ID	Gender	Age	Histology Type	EGFR_Status(WT,0; Mutation,1)	included in WB（Yes,1; No,0)
P01	Male	56	ADC	0	1
P02	Female	70	ADC	0	0
P03	Female	53	ADC	0	0
P04	Female	42	ADC	0	1
P05	Male	74	ADC	0	1
P06	Male	67	ADC	1	1
P07	Male	66	ADC	1	1
P08	Male	75	ADC	1	1
P09	Male	68	ADC	1	0
P10	Male	80	ADC	1	0

## Sheet: Table S1B
	Alanine	Arginine	Asparagine	glutamate	glutamine	glycine	histidine	isoleucine	lysine	methionine	Phenylalanine	proline	serine	threonine	tryptophan	tyrosine	valine	3-phospho-serine	citrulline	cystathionine	histidinol	homocysteic acid	homocysteine	homoserine	hydroxyphenylpyruvate	N-acetylornithine	ornithine	p-aminobenzoate/anthranilate	phenylpyruvate	prephenate	s-adenosyl-l-methionine	shikimate	taurine	3'-AMP	Cyclic AMP	Adenosine monophosphate	Cytidine monophosphate	dCMP	Deoxyadenosine monophosphate	2'-Deoxyguanosine 5'-monophosphate	5-Thymidylic acid	dUMP	Guanosine monophosphate	Inosine 2'-phosphate	Uridine 2'-phosphate	Uridine 5'-monophosphate	Xanthylic acid	Adenine	cytosine
Sample Name	Peak Area	Peak Area	Peak Area	Peak Area	Peak Area	Peak Area	Peak Area	Peak Area	Peak Area	Peak Area	Peak Area	Peak Area	Peak Area	Peak Area	Peak Area	Peak Area	Peak Area	Peak Area	Peak Area	Peak Area	Peak Area	Peak Area	Peak Area	Peak Area	Peak Area	Peak Area	Peak Area	Peak Area	Peak Area	Peak Area	Peak Area	Peak Area	Peak Area	Peak Area	Peak Area	Peak Area	Peak Area	Peak Area	Peak Area	Peak Area	Peak Area	Peak Area	Peak Area	Peak Area	Peak Area	Peak Area	Peak Area	Peak Area	Peak Area
P01-T	203463	2.48569e+06	251676	484924	979277	152999	1.30285e+06	1.1807e+06	1.85034e+06	114213	254891	421496	158570	246748	87835	895921	452139	5180.31	42053.2	46413.9	139.499	103006	34028.3	246748	92967.1	1085.35	105299	176463	44110.3	1694.99	3914.97	5319.6	2.35712e+06	132106	25628.4	132106	70885.1	80270.7	6351.37	132106	25692.6	8434.21	157713	16799.9	105792	105792	25081.9	22896.2	1202.13
P02-T	154043	2.4854e+06	152101	623476	742384	137585	1.51546e+06	1.93802e+06	1.77991e+06	168745	699111	379190	164491	218305	220246	765407	495600	13453.3	20314.1	121681	98.4728	308456	33147.9	218305	228476	78648.8	53720.9	197408	35625.9	3216.78	15690.9	6225.52	2.59451e+06	95699	21479.1	95699	45695.1	13989.6	12186.6	95699	36402.6	5660.57	50854.5	12066.4	75486.6	75486.6	18492.6	12565.7	624.586
P03-T	26752.7	386195	32867.9	13960.3	141807	26146.7	105865	119219	215079	4928.54	67631	28978.4	19128	29485.3	22014.8	17508.3	6796.16	2362.35	1956.87	76511.9	379.584	8399.34	38211.9	29485.3	35931	244719	19524.6	24229.5	418.92	1017.99	357.547	2530.93	11040.4	107760	5226.03	107760	32195.8	1538.17	643.035	107760	471.588	1564.61	218936	15547	118778	118778	19987.4	109479	156.241
P04-T	29012.3	239960	16082.7	15591.3	131139	16789	43416.1	46210.8	149566	1678.9	25511.2	24129.1	11404.3	14680.2	8516.34	8530.68	4590.37	4170.64	1889.79	49036.3	366.493	7000.21	57389.9	14680.2	25500.9	93476.1	7136.37	21313.9	379.596	858.186	1293.98	3109.04	9826.71	198602	4936.39	198602	50889.2	28633.5	1184.45	198602	1041.13	1997.28	407851	15857.5	135643	223990	46067.5	143423	380.927
P05-T	39576.6	448099	34873.5	28264.2	301928	31704.2	118425	109278	280161	4678.37	55434.4	59923.3	22636.2	28850.7	12598.2	23797.9	11820	3010.26	13173.4	37072.8	221.737	15090.8	63893.3	28850.7	36813.4	128012	36080.3	90104.8	1365.84	745.855	1669.23	3329.45	40343.6	118200	10828.6	118200	53268.9	66882.2	1610.59	118200	1101.92	1113.54	217113	16511.9	177751	177751	20177.4	87646.1	590.097
P06-T	44725.1	51866.4	49030.3	30075.2	262597	40175.1	287285	170127	432356	8938.9	101570	60415.6	35339.4	69128.1	32870.5	38624.4	15633.4	9561.22	4537.8	98081	111.935	12913.6	45684.1	69128.1	121484	219341	16455.7	34910.9	1003.46	5041.78	2479.06	3317.66	2366.84	156456	12154.5	156456	43133.6	43072.4	370.941	156456	3231.96	2895.3	193612	27728.8	146540	146540	20173.2	145418	392.977
P07-T	137011	391827	163564	362620	457678	150111	1.49048e+06	1.29134e+06	1.88789e+06	117805	273580	400324	179761	215076	106918	805251	467148	8965.92	15170.4	15196.9	35.1379	196666	15542.1	215076	423159	5207.84	45537.7	115238	37961.3	7336.47	18029.2	16675	1.74185e+06	34049.2	27437.7	34049.2	12762.9	117716	8564.09	34049.2	21427.9	2414.51	41537.1	6260.21	38589.7	38589.7	6231	13922.4	590.972
P08-T	77813.6	283353	65773.1	132606	217612	75076.4	741533	431451	1.0403e+06	48314.4	87333.6	120565	80093.3	114545	54703.9	303340	191684	9134.71	10114	75309.2	130.198	87494.2	8067.12	114545	211190	56839.1	41611.9	57015.7	14601.1	3624.18	3289.46	3703.65	1.20726e+06	15275.4	22981.3	15275.4	32356.8	119120	49911.8	15275.4	6310.82	1803.66	54607.6	4884.42	30823.6	30823.6	7041.27	14825.8	268.342
P09-T	19083.1	166743	23049.8	14249.6	120773	21506.4	199486	70029.2	352382	2517.01	40344.3	9150.68	18794.7	21362.2	11457.1	8464.09	4004.14	9306.46	2489.61	52936.6	323.966	6511.06	26165.4	21362.2	113201	191120	17885.9	25732.7	574.802	3321.88	841.216	2325.17	10176.2	99440.1	11899.9	99440.1	28415.6	55071.4	1399.14	99440.1	980.986	3088.21	123514	16818.6	98156.3	98156.3	11005.6	107373	216.074
P10-T	8226.53	59539.8	4377.96	7065.05	48634.6	12025.6	30717.6	22762.8	108585	938.334	11624.1	6122.04	5011.92	10671.8	4413.44	3020.41	1964.43	9009.87	1374.36	11894.9	466.833	3745.87	21287.6	10671.8	52219.9	84431.4	6789.61	11138.6	1097.99	1812.24	490.828	840.859	9934.2	23117.6	9402.01	11642.8	5983.86	24826.2	776.063	26740.2	1164.28	2453.67	31726	2688.96	8445	31894	4321	30390.8	166.566
P01-NAT	108298	1.68887e+06	117907	172295	359788	105367	777643	403406	1.66501e+06	99233	121792	220821	113477	174884	47333.3	602145	364967	7640.12	11599.9	51027.3	245.561	63956.2	11824.8	174884	115181	65953.1	32407.5	86624.4	30369.6	2031.69	6815.45	3772.35	1.33242e+06	32877.7	26450.8	32877.7	14401	53405.9	1230.87	32877.7	5702.49	3837.1	76264.9	5200.87	16064	16064	6520.34	6206.83	228.181
P02-NAT	96011.1	896513	138105	190016	120477	90128.5	1.09374e+06	679129	1.26807e+06	132846	164304	175504	97783.7	182127	115607	519500	420743	8746.97	16946.6	43379.3	166.252	33230.9	17628.3	182127	73328	173264	50294.3	108205	25751	1444.35	3002.66	2370.57	882293	14911	20939.7	14911	6247.83	16157.7	1625.51	14911	4256.12	6067.65	25303	3844.15	22127.9	22127.9	6207.9	4962.23	352.08
P03-NAT	6153.92	124917	5172.12	3267.72	22024.3	13728.2	38595.4	35150.2	88477.8	1842.05	17247.5	3956.77	7004.67	9749.25	5056.93	3572.08	2655.81	6780.62	1601.1	17395.4	265.159	2043.91	19889.5	9749.25	12047.9	147005	9190.19	13633.1	150.915	385.743	564.241	845.147	3075.37	23968.9	2149.59	23968.9	3957.83	561.177	397.368	23968.9	553.884	292.108	29200.2	10249.1	19297.7	19297.7	1586.3	33121	557.9
P04-NAT	5903.55	116801	4207.9	3797.04	31362	9229.3	23729	27560.8	87539	1171.08	19302.8	2163.89	5468.11	9657.57	4870.79	2035.81	2815.51	6747.8	1229.48	28452.2	239.954	1186.45	22878.6	9657.57	14487.4	74639.7	3151.57	9368.64	111.678	506.648	421.199	694.964	1785.82	51668.9	3216.12	51668.9	7442.45	3273.49	383.29	51668.9	293.538	789.634	52703.7	13800.9	21782.3	21782.3	6124.86	30860	172.025
P05-NAT	5923.53	125982	3446.74	2971.91	25320.5	9680.43	19241.3	18271.3	96138.9	1192.15	10282.7	11470.3	5155.45	10255.6	3255.01	5939.32	3194.1	5937.06	1434.64	22117.4	201.662	1579.01	27418.3	10255.6	12699.7	22388	4056.92	6961.16	287.83	817.925	128.463	828.076	3680.21	37490.1	3162.52	37490.1	7108.91	828.414	646.039	37490.1	360.464	776.871	57024.7	18406.7	23594.9	23594.9	14278.7	32583.9	64.0061
P06-NAT	2347.73	32352.3	1075.77	951.453	8357.55	3406.98	6967.02	12769.9	31109.1	650.135	5097.17	1129.67	1905.06	3601	951.453	953.608	583.447	7832.96	491.033	8278.5	180.158	588.693	13078.9	3601	8084.47	51575.3	1566.59	4344.06	116.488	389.564	391.863	377.778	731.555	8903.7	1573.06	8903.7	845.815	3904.26	260.212	8903.7	116.488	295.568	9543.27	1397	3182.05	3182.05	2104.84	17124.7	270.273
P07-NAT	82254.7	1.19802e+06	91084.7	128075	293539	81936.5	581431	307779	982442	63624.1	78165.8	155441	84720.7	113518	22226.3	373408	244059	5829.42	9561.91	36052	102.381	48127.7	17731.7	113518	165782	1123.25	24016.1	86709.5	17413.5	2970.4	2647.42	3357.01	1.29269e+06	32050.7	42972.9	32050.7	13388.3	42439.9	2223.42	32050.7	4764.25	3314.85	53425.8	5435.65	21741	21741	8002.73	5223.25	230.138
P08-NAT	111006	1.42798e+06	99045	168274	314728	85747.6	851307	727701	1.34116e+06	108081	214426	183239	93801.4	143141	125091	494996	325809	6372.24	10767	85462	174.1	49202.6	24572.8	143141	127262	65413.1	31678.4	82857.4	24138.6	1456.54	4913.41	3962.94	1.04014e+06	16187.6	35779.6	16187.6	18917.9	18655.2	20528.7	16187.6	6850.9	6757.22	38567	3325.49	35562.5	35562.5	22230.9	7835.63	310.044
P09-NAT	5120.29	65338.3	2044.87	1348.54	13137.3	7368.25	26065.7	17825.9	42905.1	1837.13	8245.62	3251.83	4694.37	7252.2	2119.14	2025.14	1080.69	6508.29	1932.29	7884.69	116.866	785.336	21876.1	7252.2	10420.5	80100.3	12394.5	8749.29	226.769	571.565	454.35	753.189	1676.98	15029	2511.4	15029	1348.54	1544.68	314.274	15029	624.949	1162.86	19032.8	3779.87	5357.04	5357.04	10586.4	32425.4	127.079
P10-NAT	4797.36	66778.9	2030.17	1532.12	18582	5340.08	10916.9	10874.5	55410.9	1089.46	6051.42	1017.76	3738.73	5449.52	2103.87	1361.26	2049.15	7034.12	1419.33	11267.5	159.912	963.939	18838.8	5449.52	11658.4	10201.1	4701.32	8945.92	174.541	742.608	394.978	434.621	1552.22	47493.4	3173.67	47493.4	2361.83	3476.3	312.342	47493.4	369.182	1130.1	10555.1	22233.6	1350.1	3289.81	10855.5	49112.6	203.463
[truncated: 103 more columns]

## Sheet: Table S1C
Sample Name	N-Acetyl-glucosamine 1-phosphate	Glucosamine-1P	Glucosamine 6-phosphate	Uridine diphosphate-N-acetylglucosamine	Uridine diphosphate glucose	Aconitate	Uridine diphosphate glucuronic acid	Allantoin	Dephospho-CoA	Orotic acid	L-Dihydroorotic acid	Uridine 5'-diphosphate	prephenate
P01-T	55563.8	9560.27	9560.27	62838.7	3620.33	46778.2	6198.16	22060.5	434.996	34446.1	21171.2	20399.8	1694.99
P02-T	28478.5	393.059	393.059	9985.98	4445.61	16634.1	4362.39	23892.4	559.492	50216.5	22653.4	98657.8	3216.78
P03-T	2579.41	377.711	377.711	112718	5606.17	16759	3863.06	7404.37	3185.42	42354.8	8019.2	45484	1017.99
P04-T	3589.17	221.431	221.431	284288	8031.1	28776.8	14741.6	7212.12	1265.32	14782.5	7748.55	21293.4	858.186
P05-T	13117	999.059	999.059	250611	3319.3	22376.8	6949.88	8283.01	1422.23	13872.7	8445.42	26888.2	745.855
P06-T	77901.7	4231.75	4231.75	8.75935e+06	22995.1	366452	4162.37	49826.1	14445.9	563.145	52845.8	343396	5041.78
P07-T	132055	20427.8	20427.8	5.0441e+06	8695.97	47281.3	128.78	48272.6	367.842	6903.67	33872.2	231007	7336.47
P08-T	73206.1	3122.5	3122.5	4.84027e+06	6290.75	43995.9	571.682	44999.3	160.459	4964.69	43113	90143.1	3624.18
P09-T	43993.7	2346.81	2346.81	5.686e+06	9616.58	215353	3267.07	39767.4	19140.8	1155.66	44859.1	225449	3321.88
P10-T	26469.4	28150	28150	3.561e+06	16516.5	39167.3	375.614	25871.9	1872.93	537.231	28383.4	106998	1812.24
P01-NAT	33198.1	12731.3	12731.3	1311.29	469.312	55907.1	1425.79	23976.8	152.598	3336.84	25421.6	1831.31	2031.69
P02-NAT	14930.5	30562.3	30562.3	3063.05	3966.86	44518.9	3841.22	32432.2	107.134	19469.1	34360.6	52446.7	1444.35
P03-NAT	819.149	184.522	184.522	10354.8	2613.54	224471	3946.2	26241.1	2998.23	31282.2	28545	10346.4	385.743
P04-NAT	504.907	159.628	159.628	29189.9	4311.38	204811	1057.35	22765.9	1203.87	34353.7	25931.8	7438.36	506.648
P05-NAT	1013.04	132.524	132.524	24869.3	4704.31	178766	713.147	26188.9	575.999	55896.8	26989.7	7736	817.925
P06-NAT	715.961	61.0036	61.0036	8853.4	1581.68	80557.3	614.779	19345.2	351.333	2422.47	21084.3	1376.88	389.564
P07-NAT	34548.6	10890.4	10890.4	1684.07	1836.01	86311.7	457.81	31573.4	180.26	8026.59	21892.2	4582.87	2970.4
P08-NAT	21933.8	18369.6	18369.6	1924.92	1485.1	53406.6	3110.72	27771.4	1065.5	71787.6	28331.2	210314	1456.54
P09-NAT	280.502	553.576	553.576	8243.3	3266.91	122669	2709.85	19647.9	1651.44	55009.5	21864.5	52259	571.565
P10-NAT	727.198	212.955	212.955	19810.3	4763.86	144613	1150.21	16594.2	466.001	54651.5	17509.9	7102.24	742.608

## Sheet: Table S1D
Metabolites
N-Acetyl-glucosamine 1-phosphate
Glucosamine-1P
Glucosamine-6P
Uridine diphosphate-N-acetylglucosamine
Uridine diphosphate glucose
Aconitate
Uridine diphosphate glucuronic acid
Allantoin
Dephospho-CoA
Orotic acid
L-Dihydroorotic acid
Uridine 5'-diphosphate
Prephenate
