# Supplementary material for: Targeting GFPT2 to reinvigorate immunotherapy in EGFR-mutated NSCLC
Source: bioRxiv preprint, doi:10.1101/2024.03.01.582888, version 1 (2024-03-04)
Supplement: Supplementary Table.10 [file 582888_file12.xlsx]

## Sheet: Description
Table S10. Metabolomics of TIF and plasma from shNC and shGFPT2 xenograft. Related to Fig.3 and Extended Data Fig.7.
Sheet	Description
Table S10A	Peak Area of metabolites of TIF and plasma.
Table S10B	Peak Area of metabolites with fold change (shGFPT2 TIF/shNC TIF > 1.5 or < 0.5 or shNC TIF/Plasma > 1.5 or < 0.5) and p < 0.05
Table S10C	A list of metabolites with fold change (shGFPT2 TIF/shNC TIF > 1.5 or < 0.5 or shNC TIF/Plasma > 1.5 or < 0.5) and p < 0.05

## Sheet: Table S10A
Sample Name	Alanine	Arginine	Asparagine	cysteine	glutamate	glutamine	glycine	histidine	isoleucine	lysine	methionine	Phenylalanine	proline	serine	threonine	tryptophan	tyrosine	valine	3-phospho-serine	citrulline	cystathionine	homocysteine	homoserine	hydroxyphenylpyruvate	N-acetylornithine	ornithine	p-aminobenzoate/anthranilate	phenylpyruvate	s-adenosyl-l-methionine	taurine	3'-AMP	Adenosine monophosphate	Cytidine monophosphate	2'-Deoxyguanosine 5'-monophosphate	5-Thymidylic acid	dUMP	Guanosine monophosphate	Inosine 2'-phosphate	Uridine 2'-phosphate	Uridine 5'-monophosphate	Xanthylic acid	Adenine	cytosine	Guanine	Hypoxanthine	Thymine	Uracil	Xanthine	Adenosine
	Peak Area	Peak Area	Peak Area	Peak Area	Peak Area	Peak Area	Peak Area	Peak Area	Peak Area	Peak Area	Peak Area	Peak Area	Peak Area	Peak Area	Peak Area	Peak Area	Peak Area	Peak Area	Peak Area	Peak Area	Peak Area	Peak Area	Peak Area	Peak Area	Peak Area	Peak Area	Peak Area	Peak Area	Peak Area	Peak Area	Peak Area	Peak Area	Peak Area	Peak Area	Peak Area	Peak Area	Peak Area	Peak Area	Peak Area	Peak Area	Peak Area	Peak Area	Peak Area	Peak Area	Peak Area	Peak Area	Peak Area	Peak Area	Peak Area
shNC-1	163078	138794	20829.9	526.252	211213	150234	124872	70336.1	593923	658787	52269.1	60827.7	124980	49009.7	87496.5	52949	93615.9	203658	2388.43	9003.28	60147.8	868.057	87496.5	16944.6	2809.34	13307.4	546.003	4063.45	305.542	3.35437e+06	31611.8	31611.8	1045.06	31611.8	7997.4	0	12918.9	802.006	8896.43	8896.43	0	3950.13	183.044	1895.2	60190.9	1013.54	257406	57309.3	1646.97
shNC-2	242829	74680.7	49710.8	4583.4	465292	568018	143783	606786	616191	371073	58396.7	342283	208478	67197.1	149018	198909	438875	215266	10534.3	35381.5	95528.5	1206.37	149018	43216.8	14067.6	90294	6449.81	24511.9	8931.26	4.36421e+06	29934.4	29934.4	14043	29934.4	10158.1	0	7190.81	2585.32	30989.5	30989.5	0	6906.19	673.525	2079.87	80962	1676.66	200790	23816.7	2175.56
shNC-3	241677	99489.1	61331.8	5328.44	561196	490484	127927	518582	602452	328772	57240.2	272152	209250	64905.6	144140	157128	391929	224190	10492.2	32715.9	136415	3331.86	144140	50364.2	18123.6	93801.5	6456.6	19846.9	10195.1	4.59415e+06	26349.3	26349.3	15738.3	26349.3	10356.4	0	7297	3565.31	26239	26239	0	4842.03	520.535	2353.1	82749.1	1113.73	254580	233528	2402.34
shNC-4	183618	52909.9	43144.4	1921.47	415440	374136	115384	596949	471694	265652	44150.7	185726	156209	51367	93380.5	148159	230768	144134	13292.2	30321.8	40873.2	737.921	93380.5	34806.9	15592.2	77395.5	7539.25	12583	8276.22	3.47494e+06	11835.5	11835.5	10934.6	11835.5	5729.91	0	7340.88	2693.89	21486	21486	0	5367.66	755.554	2099.72	42885.7	1380.01	96217.2	8911.59	1835.22
shNC-5	352289	279670	4828.31	4097.79	860839	635093	138430	896068	780439	556638	58116.9	317817	288639	56679.6	147399	261947	538592	363095	10519	51730.3	38179.1	3916.24	147399	59154.3	25578.8	142212	6277.45	28464.1	11098.2	5.4259e+06	63768.6	63768.6	100640	15982.7	12395	0	145346	9741.98	110874	110874	0	9127.1	749.425	3878.42	97473.8	2494.12	244441	13756.6	2723.22
shGFPT2-1	510302	197647	117945	9808.35	1.14269e+06	1.14176e+06	247637	1.46062e+06	1.2139e+06	738979	116234	530419	392149	126130	229509	330645	802102	455272	27168.3	66429.5	302436	4187.39	229509	100904	37827.6	201092	11029.2	41134	20148.5	9.59794e+06	71053.9	71053.9	29064.3	71053.9	15716	0	14354.1	2425.5	56995.7	56995.7	0	8534.33	1212.05	3505.29	109668	3047.48	350761	168883	729.961
shGFPT2-2	179111	52621.4	50664.3	4349.83	470014	467958	97323	442827	429424	268514	42866.3	104481	162129	52332	125271	145528	304610	188706	10394.8	29136	63488.4	3418.49	125271	33530	16030.1	77980.2	6750.16	17393.2	5987.88	3.41544e+06	12717.5	12717.5	15740.7	12717.5	8414.86	0	7572.61	2372.15	24231.7	24231.7	0	5455.57	427.14	1469.74	41449.8	1544.37	135019	5255.29	1738.56
shGFPT2-3	231060	103561	50979.2	4659.73	546510	480478	116747	512226	528252	323666	40531.8	234711	199819	49964.8	139265	148698	294454	194849	9907.77	33036	114820	2564.17	139265	45420.7	16533.2	85942.4	6885.13	14748	9117.62	4.09578e+06	18795.1	18795.1	16654.9	18795.1	9527.4	0	8267.63	3570.37	22294.5	22294.5	0	4640.46	386.147	1633.04	36829.5	1441.33	185010	122123	2090.49
shGFPT2-4	119634	28631.1	29397.6	1394.56	245435	332033	56231.5	355995	311947	217508	26437.5	89681.5	117608	29979	54962.9	96552.9	209404	113115	6999.21	20588	3604	2482.54	54962.9	21530.6	16333	54108.4	6875.87	10148.6	5586.15	2.20063e+06	8033.45	8033.45	9029.81	8033.45	4142.26	0	5079.6	2178.61	18579.4	18579.4	0	3481.54	423.829	466.467	53403.6	1094.15	59684.9	4837.34	779.471
shGFPT2-5	231354	120514	57796.7	4048.99	526130	428787	127919	678654	564590	384833	51681.4	170918	226815	50116.7	156346	158018	318783	220485	7327.6	37945.9	144044	3626.18	156346	45578	15837.7	104306	7745.64	19707.5	12147	4.14454e+06	23481.8	23481.8	15873.5	23481.8	7730.11	0	8101.57	2109.3	24831.4	24831.4	0	5146.64	611.29	1528.82	44503.1	1477.46	208183	188714	1524.05
Plasma-1	114400	505054	105812	13208.4	34993.1	1.65497e+06	92036.4	650165	1.06837e+06	619286	71180.4	295168	96535.7	39094.4	146559	587079	447637	384430	8194.01	306868	58068.6	1056.19	146559	24595.3	56753.8	756194	8302.58	25053.7	1751.47	1.16969e+06	1917.93	1917.93	1060.17	1917.93	55861.2	3256.86	714.458	2396.81	6311.07	6311.07	2975.8	18708.8	2278.59	3343.71	43400.7	6270.06	46428.3	7308.63	2919.11
Plasma-2	121077	533261	37939.5	1752.07	42207.7	1.59926e+06	97786.5	1.06244e+06	1.05216e+06	749701	111908	393228	130957	52456.7	334737	858909	814646	466472	6995.1	225266	34619.8	835.46	334737	40903.6	33895.3	574626	10166	40653.3	2311.94	2.04715e+06	2280.32	2280.32	298.247	2582	1954.94	15650.1	15597.4	9060.7	78000	78000	18113.5	10752.2	1730.99	4504	47371.7	3575.27	33078.5	6512.95	5065.19
Plasma-3	128695	615598	39389.8	738.558	39735.7	1.53035e+06	96704.5	1.14111e+06	1.06459e+06	806159	138263	338273	134005	49822.7	306867	597633	649266	422908	7305.73	269474	25616.6	1095.99	306867	53908.1	29356	680272	13013.3	32789.3	2521.74	2.33278e+06	1792.5	1792.5	611.739	1792.5	2759.94	15117.1	15037.3	12559.5	49516.6	49516.6	20134	13546.9	770.629	4889.12	54493.6	3461.24	59031.4	10656.5	3099.28
Plasma-4	117000	570228	32685.1	1630.19	45219.8	1.4459e+06	92824.6	1.05061e+06	758045	621315	79138	361000	99586.6	51087.4	221966	454095	512636	300562	7924.65	168168	43566.6	733.518	221966	54434.5	40775.1	417778	11758.2	26072.2	2206.11	2.67091e+06	1055.63	1055.63	359.78	3463.64	3227.86	15339.8	17399.5	9221.48	39718.1	39718.1	17426.6	17589.2	427.129	2847.07	61928.2	4887.86	37793.8	12633.6	2767.12
Plasma-5	156979	666342	56590.6	2957.46	48295.1	2.16287e+06	137146	1.45124e+06	1.04266e+06	816202	119188	315929	150050	80825.6	490738	841947	718626	484223	4041.28	414934	25585.8	1148.02	490738	48136.2	56797.2	1.03487e+06	15561.2	36678.2	1929.26	2.23756e+06	2069.11	2069.11	911.712	2069.11	3184.71	63948.5	60674.8	11175.1	65474.1	65474.1	64218.7	29781.2	3184.71	4397.26	99323.6	6126.28	82605.5	15283.1	10067.4
[truncated: 103 more columns]

## Sheet: Table S10B
Sample Name	Alanine	glutamate	glutamine	proline	threonine	tryptophan	homoserine	N-acetylornithine	ornithine	p-aminobenzoate/anthranilate	s-adenosyl-l-methionine	taurine	3'-AMP	Adenosine monophosphate	2'-Deoxyguanosine 5'-monophosphate	Xanthylic acid	Adenine	Thymine	Uracil	Adenosine	Cytidine	Deoxyuridine	Guanosine	Thymidine	Uridine	Xanthosine	ADP	dCTP	Thymidine 5'-triphosphate	Ureidosuccinic acid(Carbamyl-L-aspartic acid)	L-Dihydroorotic acid	N-Acetyl-glucosamine 1-phosphate	Orotidine	6-Phospho-d-gluconate	Allantoate	Allantoin	Fructose 1,6-bisphosphate	Reduced glutathione	2,3-Dihydroxybenzoate（2-Pyrocatechuic acid）	4-Hydroxybenzoic acid（p-Hydroxybenzoate）	Glucose 6-phosphate	Beta-D-Fructose 6-phosphate	D-Glyceraldehyde 3-phosphate	3-Phosphoglyceric acid	6-phosphogluconate	D-Sedoheptulose 7-phosphate	D-Erythrose 4-phosphate	5-Hydroxytryptamine
	Peak area	Peak area	Peak area	Peak area	Peak area	Peak area	Peak area	Peak area	Peak area	Peak area	Peak area	Peak area	Peak area	Peak area	Peak area	Peak area	Peak area	Peak area	Peak area	Peak area	Peak area	Peak area	Peak area	Peak area	Peak area	Peak area	Peak area	Peak area	Peak area	Peak area	Peak area	Peak area	Peak area	Peak area	Peak area	Peak area	Peak area	Peak area	Peak area	Peak area	Peak area	Peak area	Peak area	Peak area	Peak area	Peak area	Peak area	Peak area
shNC-1	163078	211213	150234	124980	87496.5	52949	87496.5	2809.34	13307.4	546.003	305.542	3.35437e+06	31611.8	31611.8	31611.8	0	3950.13	1013.54	257406	1646.97	19998.9	115050	308.564	4339.75	42793.1	2789.91	6765.95	21229.3	5859.36	2161.78	25373.7	15422.8	1381.47	21412.7	1150.5	41605.9	1775.4	2338.78	4744.47	1149.42	43149.2	43149.2	1432.19	5451.4	21412.7	3359.77	446.71	895.795
shNC-2	242829	465292	568018	208478	149018	198909	149018	14067.6	90294	6449.81	8931.26	4.36421e+06	29934.4	29934.4	29934.4	0	6906.19	1676.66	200790	2175.56	53882	50757.7	245.528	22589.9	56695.5	19400.1	6194.63	5918.19	3947.09	10452.5	31823.7	64539	7805.04	57333.4	7904.82	57325.3	7744.51	26908.3	8833.11	21968.3	165294	165294	4271.79	45695	57333.4	20414.3	4317.59	2545.25
shNC-3	241677	561196	490484	209250	144140	157128	144140	18123.6	93801.5	6456.6	10195.1	4.59415e+06	26349.3	26349.3	26349.3	0	4842.03	1113.73	254580	2402.34	55865	30653.2	402.965	26867.1	53819.2	18200	7211.26	5907.38	3864.96	6500.74	26646.4	84599.7	11230.7	126144	10254.5	42987.4	11748.5	20254.3	8701.05	18650	169607	169607	5659.5	94056.2	126144	18666.9	3513.53	1966.01
shNC-4	183618	415440	374136	156209	93380.5	148159	93380.5	15592.2	77395.5	7539.25	8276.22	3.47494e+06	11835.5	11835.5	11835.5	0	5367.66	1380.01	96217.2	1835.22	36426.5	20728.9	486.645	15458	74999.6	7845.92	3539.15	3526.69	2318.22	1084.84	16358.8	53609.5	6860.75	43901.5	7356.21	27983.5	5834.37	12266.7	11730.1	16445.1	104363	104363	4071.02	47073.6	43901.5	12707.6	2576.02	2662.27
shNC-5	352289	860839	635093	288639	147399	261947	147399	25578.8	142212	6277.45	11098.2	5.4259e+06	63768.6	63768.6	15982.7	0	9127.1	2494.12	244441	2723.22	6846.94	38589.7	770.821	40383.6	74283.3	15042.5	10968.5	2899.36	2272.59	11595.3	40837.4	56279.8	8681.87	66794.4	15193.8	49439.3	10655.1	25027.7	11638.5	15323.5	176901	176901	4478.18	169228	66794.4	23212.2	3678.5	4455.48
shGFPT2-1	510302	1.14269e+06	1.14176e+06	392149	229509	330645	229509	37827.6	201092	11029.2	20148.5	9.59794e+06	71053.9	71053.9	71053.9	0	8534.33	3047.48	350761	729.961	111887	75030.9	2140.87	44995.4	169554	16446.7	15679	14289.4	7757.43	4178.14	34914.2	162594	21464.1	184144	8011.77	62545	27376.4	40648.5	29549.9	45781.5	304979	304979	10134.4	111725	184144	50775.9	6168.95	5035.97
shGFPT2-2	179111	470014	467958	162129	125271	145528	125271	16030.1	77980.2	6750.16	5987.88	3.41544e+06	12717.5	12717.5	12717.5	0	5455.57	1544.37	135019	1738.56	40360.9	24163.2	402.466	17248.6	30148.8	14575.6	3461.13	2618.89	2436.88	3806.87	26767.6	60320.5	6258.22	56223.4	9663.76	33385.3	13654.2	19997.7	5882.02	15839.7	153752	153752	4449.59	65894.8	56223.4	15390.4	3748.23	2638.69
shGFPT2-3	231060	546510	480478	199819	139265	148698	139265	16533.2	85942.4	6885.13	9117.62	4.09578e+06	18795.1	18795.1	18795.1	0	4640.46	1441.33	185010	2090.49	53788.8	28025.3	841.47	23390	41505.5	19180.6	5608.11	3089.58	2837.02	2905.99	19971.7	84015.2	9320.48	127701	12526.7	23359.5	14555.3	25225.9	5838.36	19981.9	169795	169795	6295.81	110864	127701	16188.4	4052.16	2505.34
shGFPT2-4	119634	245435	332033	117608	54962.9	96552.9	54962.9	16333	54108.4	6875.87	5586.15	2.20063e+06	8033.45	8033.45	8033.45	0	3481.54	1094.15	59684.9	779.471	24887.1	15725.1	819.907	9910.77	59015.3	4192.48	1642.1	2054.39	1111.77	402.245	16500.3	30225.7	3516.78	17733.7	8389.36	24041.3	2147.77	6136.75	8710.03	9258.86	54663.4	54663.4	1767.2	26199.7	17733.7	11311.5	1027.2	1436.84
shGFPT2-5	231354	526130	428787	226815	156346	158018	156346	15837.7	104306	7745.64	12147	4.14454e+06	23481.8	23481.8	23481.8	0	5146.64	1477.46	208183	1524.05	61762.1	27566.6	403.466	24867.3	52075.5	17951.7	5897.91	4840.87	1902.67	4286.68	15551	93162.7	9654.28	133175	12039.5	21845.4	18107	23374.3	6127.24	20758.6	155510	155510	5831.03	111855	133175	17689	3552.12	3303.69
Plasma-1	114400	34993.1	1.65497e+06	96535.7	146559	587079	146559	56753.8	756194	8302.58	1751.47	1.16969e+06	1917.93	1917.93	1917.93	2975.8	18708.8	6270.06	46428.3	2919.11	151263	5405.18	13196.3	965.598	101168	6950.38	1483.68	471.762	2202.6	27828	107440	8920.17	17562.9	31495	3565.66	116246	899.375	19070.7	18515.8	20337.3	15283.1	15283.1	1613.95	1413.72	772.479	6900.92	737.98	24281.7
Plasma-2	121077	42207.7	1.59926e+06	130957	334737	858909	334737	33895.3	574626	10166	2311.94	2.04715e+06	2280.32	2280.32	2582	18113.5	10752.2	3575.27	33078.5	5065.19	66183.4	267948	11951	3815.03	692792	3207.74	46568.2	56883	15136.3	37320.4	152417	5008.55	14714.7	2372.54	466.999	192069	933.866	71795.3	119312	42444.9	7046.48	7046.48	850.873	916.345	7842.16	110986	964.165	19299.1
Plasma-3	128695	39735.7	1.53035e+06	134005	306867	597633	306867	29356	680272	13013.3	2521.74	2.33278e+06	1792.5	1792.5	1792.5	20134	13546.9	3461.24	59031.4	3099.28	59683.5	235806	10936	5405.45	750401	5639.65	40960	58685.4	24458.9	33680.9	171798	3145.86	16740.6	1716.65	844.751	195352	1286.69	78340.4	119021	38098.9	6076.14	6076.14	710.612	2540.37	9874.05	97848.9	1141.9	20120.7
Plasma-4	117000	45219.8	1.4459e+06	99586.6	221966	454095	221966	40775.1	417778	11758.2	2206.11	2.67091e+06	1055.63	1055.63	3463.64	17426.6	17589.2	4887.86	37793.8	2767.12	71292	229148	10415.3	3783.45	669421	6106.1	33809.8	57686.8	25218.5	38715.3	132136	6379.83	23646.6	2032.66	1756.21	155159	1611.22	75262.4	106132	42387.6	7965.3	7965.3	593.806	2378.21	9506.05	94613.3	1678.97	12465.6
Plasma-5	156979	48295.1	2.16287e+06	150050	490738	841947	490738	56797.2	1.03487e+06	15561.2	1929.26	2.23756e+06	2069.11	2069.11	2069.11	64218.7	29781.2	6126.28	82605.5	10067.4	94556.1	313545	17671.7	4711.91	1.02264e+06	2742.92	44449.3	78696.1	36805.4	40476.4	206116	5266.54	18911.2	2749.28	708.932	241078	1660.69	97496.1	158521	52856.1	8257.37	8257.37	710.681	944.767	11874.3	135414	1383.54	32149.1

## Sheet: Table S10C
Metabolites
Alanine
glutamate
glutamine
proline
threonine
tryptophan
homoserine
N-acetylornithine
ornithine
p-aminobenzoate/anthranilate
s-adenosyl-l-methionine
taurine
3'-AMP
Adenosine monophosphate
2'-Deoxyguanosine 5'-monophosphate
Xanthylic acid
Adenine
Thymine
Uracil
Adenosine
Cytidine
Deoxyuridine
Guanosine
Thymidine
Uridine
Xanthosine
ADP
dCTP
Thymidine 5'-triphosphate
Ureidosuccinic acid(Carbamyl-L-aspartic acid)
L-Dihydroorotic acid
N-Acetyl-glucosamine 1-phosphate
Orotidine
6-Phospho-d-gluconate
Allantoate
Allantoin
Fructose 1,6-bisphosphate
Reduced glutathione
2,3-Dihydroxybenzoate（2-Pyrocatechuic acid）
4-Hydroxybenzoic acid（p-Hydroxybenzoate）
Glucose 6-phosphate
Beta-D-Fructose 6-phosphate
D-Glyceraldehyde 3-phosphate
3-Phosphoglyceric acid
6-phosphogluconate
D-Sedoheptulose 7-phosphate
D-Erythrose 4-phosphate
5-Hydroxytryptamine
